# Supplementary material
Source: PubMed Central journal article supplement (PMC6309981)
Supplement: NIHMS1510699-supplement-Supplemental_Material.pdf [file NIHMS1510699-supplement-Supplemental_Material.pdf]

## SUPPLEMENTAL MATERIAL

1. **Online Supplemental Methods** (methods taken directly from manufacturer's protocol from Olink; please see full legend for details)
2. **Supplementary Table I.** Proteins assayed on the Olink platform "Cardiometabolic" and "Cardiovascular Disease III" panel.
3. **Supplementary Table II.** Proteins assayed on the Luminex platform in FHS. Median value of coefficient of variation for FHS plasma samples is provided. (Number of FHS samples with measurable protein concentration varied by protein.)
4. **Supplementary Table III.** Characteristics of 181 proteins assayed in the Olink platform. In the "Missing Observations" column, the number in the parenthesis specifies the number of samples (participants) in whom the protein was measured below the detection limit of the assay. The "Included\_in\_analysis" tab specifies whether the given protein was included in the present analysis (e.g., whether the protein is expressed above detection limit in >50% of the overall samples assayed). The P values specified are Bonferroni adjusted for multiple comparisons for the 139 proteins that were included in the analysis. NA refers to those entries where all sample values were "missing."
5. **Supplementary Table IV.** Genes encoding 19 proteins differentially expressed after bariatric surgery, and ratio of expression in the top and next highest expressing tissue, expressed as fold change (log).
6. **Supplementary Table V.** STRING-expanded set of 26 proteins for pathway analysis. This list contains contains 16/19 proteins identified from the bariatric surgical cohort, "augmented" by 10 additional proteins identified by STRING. Details in text.
7. **Supplementary Table VI.** Characteristics of FHS participants stratified by new-onset diabetes or metabolic syndrome. Values are expressed as mean with standard deviation or frequency and percentage. Comparisons for continuous variables were performed age- and sex-adjusted via a linear regression. Comparisons for categorical variables were performed age- and sex-adjusted via a logistic regression. The \* and \*\* indicate  $P < 0.05$  for comparison between individuals with or without diabetes (\*) or metabolic syndrome (\*\*).
8. **Supplementary Figure I.** Selection scheme for bariatric surgery discovery cohort. Run 1 is comprised of 10 subjects assayed serially at Visits 1-3 with (N=4) and without (N=6) diabetes at baseline; subjects with diabetes resolved their diabetes at subsequent study visits. An additional 30 samples (baseline Visit 1) were assayed as part of other efforts in the laboratory not connected to the current project, and were therefore not included. Run 2 included samples from subjects with diabetes at baseline visit (N=13) and subjects without diabetes with greatest relative change in hemoglobin A1c over Visit 1 to Visit 2. \*In Run 2, one participant with diabetes and serial Visit 1-3 samples was excluded in error (with a subject with pre-diabetes in its place in error); an additional 2 subjects in the non-

diabetic cohort of Run 2 did not have samples run (in error) and 1 subject only had 2 study visits assayed. Additional details in text.

9. **Supplementary Figure II.** Principal component analysis plot showing raw protein expression exhibiting batch effects between Run 1 and Run 2 (left) and after correction of batch effects (right) for the Cardiometabolic panel (A) and the Cardiovascular III panel (B).
10. **Supplementary Figure III.** Boxplot of 19 plasma proteins differentially expressed (at a type 1 error Bonferroni adjusted  $P < 0.05$ ) between Visit 1 and both post-operative time points.

## Online Supplemental Methods

***The following methods are reproduced from Olink User Manual (and this statement serves as the direct reference attribution/credit to the primary source for this material:***

***<https://www.olink.com/products/document-download-center/>***. Of note, the wording may be slightly modified below (relative to the methods on the website).

### **Proximity Extension Assay Protocol**

**Principle:** The Proseek reagents are based on PEA, a Proximity Extension Assay technology, in which 96 oligonucleotide-labeled antibody pairs can bind to their respective protein targets in the sample. A PCR reporter sequence is formed by a proximity-dependent DNA polymerization event and is subsequently detected and quantified using real-time PCR. The assay is performed in a homogeneous 96-well format with no need for washing steps. There are three core steps; incubation, extension and detection.

#### **Reagents and consumables:**

1. Proseek Multiplex Probe Kit
  - a. Incubation Solution contains components needed for the incubation reaction.
  - b. A-probes contains 96 antibody probes labeled with A oligos
  - c. B-probes contains 96 antibody probes labeled with B oligos
2. Proseek Multiplex Detection Kit
  - a. PEA Solution contains components needed for the extension reaction
  - b. PEA Enzyme for extension of A and B probes which are bound to their target
  - c. PCR Polymerase, for pre-amplification of the extension product created by the PEA enzyme
  - d. Detection Solution contains components needed for the detection reaction
  - e. Detection Enzyme for qPCR amplification
  - f. Primer Plate 96-well plate with ready-to-use primers for amplification of extension product
3. Proseek Multiplex Controls
  - a. Interplate Control for normalization between runs
  - b. Negative Control for determination of background levels
  - c. Incubation Stabilizer for stabilization of the incubation reaction

4. Dynamic Array 96.96 GE (Fluidigm, South San Francisco, CA, USA)

**Experimental Design:**

Ninety plasma samples (20 µl each) organized randomly in a 96 well PCR plate. Plate positions C12, D12 and E12 left empty for Negative Control, F12, G12 and H12 left empty for Interplate Control.

**Sample Dilutions:**

Plasma samples diluted 1:100 for Cardiovascular III panel (Catalog No: 94600) with Sample Diluent and 1:2025 for Cardiometabolic Panel (Catalog No: 94360).

**Incubation:**

1. Plasma samples thawed, vortexed and spun down at 150 xg for 1 min at room temperature and diluted (see above Sample Dilution section).
2. Incubation Stabilizer thawed, vortexed and spun briefly.
3. Interplate Control and Negative Control tubes thawed, vortexed and spun briefly.
4. Following Incubation mix prepared in a microcentrifuge tube.

|                       |                 |
|-----------------------|-----------------|
| Incubation Solution   | 280.0 µl        |
| Incubation Stabilizer | 40.0 µl         |
| A-probes              | 40.0 µl         |
| B-probes              | 40.0 µl         |
| <b>Total</b>          | <b>400.0 µl</b> |

5. This incubation mix vortexed briefly and spun down the content and 47 µL of this mixture transferred into each well of an 8-well strip.
6. Three µL of the Incubation mix from the 8-well strip to the bottom of each well of a 96-well plate pipetted by a multichannel pipet.
7. One µL of each diluted plasma samples added to the bottom of the well of the Incubation Plate according to our plate layout.
8. One µL of Negative Control added to the bottom of each Negative Control well in positions (C12, D12 and E12 according to the plate layout).

9. One 1  $\mu\text{L}$  of Interplate Control added to the bottom of each Negative Control well in positions (F12, G12 and H12 according to the plate layout).
10. Incubation Plate sealed with an adhesive plastic film and plate spun at 150 xg for 1 min at room temperature.
11. Incubation Plate incubated overnight at +4°C.

**Extension:**

12. PEA Solution thawed, vortexed and spun briefly.
13. Extension mix in a centrifuge tube prepared according to following pipetting schedule in a freezing block.

|                   |                       |
|-------------------|-----------------------|
| High Purity Water | 9,385.0 $\mu\text{l}$ |
| PEA Solution      | 1,100.0 $\mu\text{l}$ |
| PEA Enzyme        | 55.0 $\mu\text{l}$    |
| PCR Polymerase    | 22.0 $\mu\text{l}$    |

**Total            10,562.0  $\mu\text{l}$**

14. Extension mix vortexed.
15. Incubation Plate brought to room temperature, spun down at 150 x g for 1 min at room temperature.
16. Extension mix poured into a multi-channel pipette reservoir.
17. Plastic adhesive film carefully removed from the Incubation Plate.
18. Ninety-six  $\mu\text{L}$  of Extension mix pipetted into to each well of the Incubation Plate by using reverse pipetting within 5 min.
19. New adhesive film sealed to the Incubation Plate.
20. Plate vortexed gently and spun down at 150 xg for 1 min at room temperature.
21. After the 5 min, Incubation Plate placed in the thermal cyclor and following PEA program performed.

|           |      |                          |
|-----------|------|--------------------------|
| Extension | 50°C | 20 min                   |
| Hot start | 95°C | 5 min                    |
| PCR Cycle | 95°C | 30 s                     |
|           | 54°C | 1 min                    |
|           | 60°C | 1 min total of 17 cycles |
| Hold      | 10°C | ∞                        |

**Detection:**

22. Control fluid injected to a Dynamic Array 96.96 GE and placed on an IFC Controller HX and primed.

23. Primer Plate thawed, vortexed and spun at 150 xg for 1 min at room temperature.

24. Detection Solution thawed, vortexed and spun briefly and Detection Mix in a centrifuge tube is prepared according to following pipetting schedule in a freezing block.

|                    |          |
|--------------------|----------|
| Detection Solution | 550.0 µl |
| High Purity Water  | 230.0 µl |
| Detection Enzyme   | 7.8 µl   |
| PCR Polymerase     | 3.1 µl   |

**Total            790.9 µl**

25. Detection mix spun briefly and transferred 95 µL into each well of an 8-well strip.

26. 7.2 µl transferred into each well of a new 96-well plate by reverse pipetting.

27. Incubation Plate removed from the thermal cycler, vortexed and spun briefly.

28. Plastic film carefully removed and 2.8 µL transferred from each well of the Incubation Plate to the Sample Plate prepared above.

29. Sample Plate sealed with a new plastic adhesive film, vortexed and spun at 150 xg for 1 min at room temperature.

30. Primer Plate seal gently removed to avoid contamination between wells.

31. 5 µl from each well of the Primer Plate transferred into Assay Inlets of the primed Dynamic Array 96.96 GE by using reverse pipetting.
32. 5 µl from each well of the Sample Plate transferred into the Sample Inlets of the Dynamic Array 96.96 GE by using reverse pipetting.
33. Dynamic Array 96.96 GE placed on IFC Controller HX and load program started.
34. When load completed Dynamic Array 96.96 GE removed from IF Controller HX and placed on BioMark HD System.
35. Olink Protein Expression 96×96 Program started on BioMark Data Collection Software.
36. When program completed Fluidigm Real Time PCR Analysis Software started and in sample inlets sample names entered. For Assay names “.plt” file which recognized by Fluidigm Real Time PCR Analysis Software downloaded from [www.olink.com/products/proseek-multiplex/downloads/data-analysis-files](http://www.olink.com/products/proseek-multiplex/downloads/data-analysis-files)
37. Quality Treshold set to 0.5 and Linear mode and Auto (global) selected under Analysis Settings. Then Analysis performed. When analysis completed file saved and exported as a Heat Map Results.

#### **Data Analysis:**

Exported csv files in Heat Map Result form from BioMark Real Time PCR Analysis Software imported into Olink NPX Manager Software v1.0.0.2 and NPX values obtained by normalizing raw Cq values to inter-plate controls.

#### **References**

1. Lundberg, M., et.al. Homogeneous antibody-based proximity extension assays provide sensitive and specific detection of low abundant proteins in human blood. *Nucleic Acid Res* 6 June (2011). doi: 10.1093/nar/gkr424.
2. Assarsson E., et.al. Homogenous 96-Plex PEA Immunoassay Exhibiting High Sensitivity, Specificity, and Excellent Scalability. *PLOS One* 6 April (2014)

Supplementary Table I.

| Cardiometabolic Panel                                                |             |                                                                     |             |
|----------------------------------------------------------------------|-------------|---------------------------------------------------------------------|-------------|
| Protein Name (Short Name)                                            | Uniprot Nr. | Protein Name (Short Name)                                           | Uniprot Nr. |
| Angiogenin (ANG)                                                     | P03950      | Low affinity immunoglobulin gamma Fc region receptor II-a (FCGR2A)  | P12318      |
| Angiopoietin-related protein 3 (ANGPTL3)                             | Q9Y5C1      | Low affinity immunoglobulin gamma Fc region receptor III-B (FCGR3B) | O75015      |
| Apolipoprotein M (APOM)                                              | O95445      | Lymphatic vessel endothelial hyaluronic acid receptor 1 (LYVE1)     | Q9Y5Y7      |
| Beta-Ala-His dipeptidase (CNDP1)                                     | Q96KN2      | Lysosomal Pro-X carboxypeptidase (PRCP)                             | P42785      |
| Beta-galactoside alpha-2,6-sialyltransferase 1 (ST6GAL1)             | P15907      | Mannose-binding protein C (MBL2)                                    | P11226      |
| C-C motif chemokine 14 (CCL14)                                       | Q16627      | Mast/stem cell growth factor receptor Kit (KIT)                     | P10721      |
| C-C motif chemokine 18 (CCL18)                                       | P55774      | Membrane cofactor protein (CD46)                                    | P15529      |
| C-C motif chemokine 5 (CCL5)                                         | P13501      | Membrane primary amine oxidase (AOC3)                               | Q16853      |
| Cadherin-1 (CDH1)                                                    | P12830      | Metalloproteinase inhibitor 1 (TIMP1)                               | P01033      |
| Carbonic anhydrase 1 (CA1)                                           | P00915      | Microfibrillar-associated protein 5 (MFAP5)                         | Q13361      |
| Carbonic anhydrase 3 (CA3)                                           | P07451      | Multiple epidermal growth factor-like domains protein 9 (MEGF9)     | Q9H1U4      |
| Carbonic anhydrase 4 (CA4)                                           | P22748      | Neural cell adhesion molecule 1 (NCAM1)                             | P13591      |
| Cartilage acidic protein 1 (CRTAC1)                                  | Q9NQ79      | Neural cell adhesion molecule L1-like protein (CHL1)                | O00533      |
| Cartilage oligomeric matrix protein (COMP)                           | P49747      | Neurogenic locus notch homolog protein 1 (NOTCH1)                   | P46531      |
| CD59 glycoprotein (CD59)                                             | P13987      | Neuropilin-1 (NRP1)                                                 | O14786      |
| Coagulation factor VII (F7)                                          | P08709      | Neutrophil defensin 1 (DEFA1)                                       | P59665      |
| Coagulation factor XI (F11)                                          | P03951      | Neutrophil gelatinase-associated lipocalin (LCN2)                   | P80188      |
| Collagen alpha-1(XVIII) chain (COL18A1)                              | P39060      | Nidogen-1 (NID1)                                                    | P14543      |
| Complement C1q tumor necrosis factor-related protein 1 (C1QTNF1)     | Q9BXJ1      | Oncostatin-M-specific receptor subunit beta (OSMR)                  | Q99650      |
| Complement C2 (C2)                                                   | P06681      | Peptidyl-glycine alpha-amidating monooxygenase (PAM)                | P19021      |
| Complement factor H-related protein 5 (CFHR5)                        | Q9BXR6      | Phospholipid transfer protein (PLTP)                                | P55058      |
| Complement receptor type 2 (CR2)                                     | P20023      | Plasma serine protease inhibitor (SERPINA5)                         | P05154      |
| Cystatin-C (CST3)                                                    | P01034      | Platelet glycoprotein Ib alpha chain (GP1BA)                        | P07359      |
| Dipeptidyl peptidase 4 (DPP4)                                        | P27487      | Platelet-activating factor acetylhydrolase (PLA2G7)                 | Q13093      |
| EGF-containing fibulin-like extracellular matrix protein 1 (EFEMP1)  | Q12805      | Plexin-B2 (PLXNB2)                                                  | O15031      |
| Endoglin (ENG)                                                       | P17813      | Procollagen C-endopeptidase enhancer 1 (PCOLCE)                     | Q15113      |
| Fetuin-B (FETUB)                                                     | Q9UGM5      | Prolyl endopeptidase FAP (FAP)                                      | Q12884      |
| Ficolin-2 (FCN2)                                                     | Q15485      | Receptor-type tyrosine-protein phosphatase S (PTPRS)                | Q13332      |
| Glutamyl-peptide cyclotransferase (QPCT)                             | Q16769      | Regenerating islet-derived protein 3-alpha (REG3A)                  | Q06141      |
| Granulysin (GNLY)                                                    | P22749      | Serum amyloid A-4 protein (SAA4)                                    | P35542      |
| Growth arrest-specific protein 6 (GAS6)                              | Q14393      | SPARC-like protein 1 (SPARCL1)                                      | Q14515      |
| Hepatocyte growth factor receptor (MET)                              | P08581      | Superoxide dismutase [Cu-Zn] (SOD1)                                 | P00441      |
| Ig lambda-2 chain C regions (IGLC2)                                  | P0CG05      | T-cell immunoglobulin and mucin domain-containing protein 4 (TIMD4) | Q96H15      |
| Insulin-like growth factor-binding protein 3 (IGFBP3)                | P17936      | Tenascin (TNC)                                                      | P24821      |
| Insulin-like growth factor-binding protein 6 (IGFBP6)                | P24592      | Tenascin-X (TNXB)                                                   | P22105      |
| Integrin alpha-M (ITGAM)                                             | P11215      | Thrombospondin-4 (THBS4)                                            | P35443      |
| Intercellular adhesion molecule 1 (ICAM1)                            | P05362      | Thyroxine-binding globulin (SERPINA7)                               | P05543      |
| Intercellular adhesion molecule 3 (ICAM3)                            | P32942      | Transcobalamin-2 (TCN2)                                             | P20062      |
| Interleukin-7 receptor subunit alpha (IL7R)                          | P16871      | Transforming growth factor beta receptor type 3 (TGFB3)             | Q03167      |
| L-selectin (SELL)                                                    | P14151      | Transforming growth factor-beta-induced protein ig-h3 (TGFB1)       | Q15582      |
| Latent-transforming growth factor beta-binding protein 2 (LTBP2)     | Q14767      | Trypsin-2 (PRSS2)                                                   | P07478      |
| Leukocyte immunoglobulin-like receptor subfamily B member 1 (LILRB1) | Q8NHL6      | Tyrosine-protein kinase receptor Tie-1 (TIE1)                       | P35590      |
| Leukocyte immunoglobulin-like receptor subfamily B member 2 (LILRB2) | Q8N423      | Uromodulin (UMOD)                                                   | P07911      |
| Leukocyte immunoglobulin-like receptor subfamily B member 5 (LILRB5) | O75023      | Vascular cell adhesion protein 1 (VCAM1)                            | P19320      |
| Lithostathine-1-alpha (REG1A)                                        | P05451      | Vasorin (VASN)                                                      | Q6EMK4      |
| Liver carboxylesterase 1 (CES1)                                      | P23141      | Vitamin K-dependent protein C (PROC)                                | P04070      |



**CVD III Panel (CCL2 removed from the panel by Olink)**

| <b>Protein Name (Short Name)</b>                       | <b>Uniprot Nr.</b> | <b>Protein Name (Short Name)</b>                                    | <b>Uniprot Nr.</b> |
|--------------------------------------------------------|--------------------|---------------------------------------------------------------------|--------------------|
| Aminopeptidase N (AP-N)                                | P15144             | Matrix metalloproteinase-2 (MMP-2)                                  | P08253             |
| Azurocidin (AZU1)                                      | P20160             | Matrix metalloproteinase-3 (MMP-3)                                  | P08254             |
| Bleomycin hydrolase (BLM hydrolase)                    | Q13867             | Matrix metalloproteinase-9 (MMP-9)                                  | P14780             |
| C-C motif chemokine 15 (CCL15)                         | Q16663             | Metalloproteinase inhibitor 4 (TIMP4)                               | Q99727             |
| C-C motif chemokine 16 (CCL16)                         | O15467             | Monocyte chemotactic protein 1 (MCP-1)                              | P13500             |
| C-C motif chemokine 24 (CCL24)                         | O00175             | Myeloblastin (PRTN3)                                                | P24158             |
| C-X-C motif chemokine 16 (CXCL16)                      | Q9H2A7             | Myeloperoxidase (MPO)                                               | P05164             |
| Cadherin-5 (CDH5)                                      | P33151             | Myoglobin (MB)                                                      | P02144             |
| Carboxypeptidase A1 (CPA1)                             | P15085             | N-terminal prohormone brain natriuretic peptide (NT-proBNP)         | NA                 |
| Carboxypeptidase B (CPB1)                              | P15086             | Neurogenic locus notch homolog protein 3 (Notch 3)                  | Q9UM47             |
| Caspase-3 (CASP-3)                                     | P42574             | Osteopontin (OPN)                                                   | P10451             |
| Cathepsin D (CTSD)                                     | P07339             | Osteoprotegerin (OPG)                                               | O00300             |
| Cathepsin Z (CTSZ)                                     | Q9UBR2             | P-selectin (SELP)                                                   | P16109             |
| CD166 antigen (ALCAM)                                  | Q13740             | Paraoxonase (PON3)                                                  | Q15166             |
| Chitinase-3-like protein 1 (CHI3L1)                    | P36222             | Peptidoglycan recognition protein 1 (PGLYRP1)                       | O75594             |
| Chitotriosidase-1 (CHIT1)                              | Q13231             | Perlecan (PLC)                                                      | P98160             |
| Collagen alpha-1(I) chain (COL1A1)                     | P02452             | Plasminogen activator inhibitor 1 (PAI)                             | P05121             |
| Complement component C1q receptor (CD93)               | Q9NPY3             | Platelet endothelial cell adhesion molecule (PECAM-1)               | P16284             |
| Contactin-1 (CNTN1)                                    | Q12860             | Platelet-derived growth factor subunit A (PDGF subunit A)           | P04085             |
| Cystatin-B (CSTB)                                      | P04080             | Proprotein convertase subtilisin/kexin type 9 (PCSK9)               | Q8NBP7             |
| E-selectin (SELE)                                      | P16581             | Protein delta homolog 1 (DLK-1)                                     | P80370             |
| Elafin (PI3)                                           | P19957             | Pulmonary surfactant-associated protein D (PSP-D)                   | P35247             |
| Ephrin type-B receptor 4 (EPHB4)                       | P54760             | Resistin (RETN)                                                     | Q9HD89             |
| Epidermal growth factor receptor (EGFR )               | P00533             | Retinoic acid receptor responder protein 2 (RARRES2)                | Q99969             |
| Epithelial cell adhesion molecule (Ep-CAM)             | P16422             | Scavenger receptor cysteine-rich type 1 protein M130 (CD163)        | Q86VB7             |
| Fatty acid-binding protein, adipocyte (FABP4)          | P15090             | Secretoglobin family 3A member 2 (SCGB3A2)                          | Q96PL1             |
| Galectin-3 (Gal-3)                                     | P17931             | Spondin-1 (SPON1)                                                   | Q9HCB6             |
| Galectin-4 (Gal-4)                                     | P56470             | ST2 protein (ST2)                                                   | Q01638             |
| Granulins (GRN)                                        | P28799             | Tartrate-resistant acid phosphatase type 5 (TR-AP)                  | P13686             |
| Growth/differentiation factor 15 (GDF-15)              | Q99988             | Tissue factor pathway inhibitor (TFPI)                              | P10646             |
| Insulin-like growth factor-binding protein 1 (IGFBP-1) | P08833             | Tissue-type plasminogen activator (t-PA)                            | P00750             |
| Insulin-like growth factor-binding protein 2 (IGFBP-2) | P18065             | Transferrin receptor protein 1 (TR)                                 | P02786             |
| Insulin-like growth factor-binding protein 7 (IGFBP-7) | Q16270             | Trefoil factor 3 (TFF3)                                             | Q07654             |
| Integrin beta-2 (ITGB2)                                | P05107             | Trem-like transcript 2 protein (TLT-2)                              | Q5T2D2             |
| Intercellular adhesion molecule 2 (ICAM-2)             | P13598             | Tumor necrosis factor ligand superfamily member 13B (TNFSF13B)      | Q9Y275             |
| Interleukin-1 receptor type 1 (IL-1RT1)                | P14778             | Tumor necrosis factor receptor 1 (TNF-R1)                           | P19438             |
| Interleukin-1 receptor type 2 (IL-1RT2)                | P27930             | Tumor necrosis factor receptor 2 (TNF-R2)                           | P20333             |
| Interleukin-17 receptor A (IL-17RA)                    | Q96F46             | Tumor necrosis factor receptor superfamily member 10C (TNFRSF10C)   | O14798             |
| Interleukin-18-binding protein (IL-18BP)               | O95998             | Tumor necrosis factor receptor superfamily member 14 (TNFRSF14)     | Q92956             |
| Interleukin-2 receptor subunit alpha (IL2-RA)          | P01589             | Tumor necrosis factor receptor superfamily member 6 (FAS )          | P25445             |
| Interleukin-6 receptor subunit alpha (IL-6RA)          | P08887             | Tyrosine-protein kinase receptor UFO (AXL)                          | P30530             |
| Junctional adhesion molecule A (JAM-A)                 | Q9Y624             | Tyrosine-protein phosphatase non-receptor type substrate 1 (SHPS-1) | P78324             |
| Kallikrein-6 (KLK6 )                                   | Q92876             | Urokinase plasminogen activator surface receptor (U-PAR)            | Q03405             |
| Low-density lipoprotein receptor (LDL receptor)        | P01130             | Urokinase-type plasminogen activator (uPA)                          | P00749             |
| Lymphotoxin-beta receptor (LTBR)                       | P36941             | von Willebrand factor (vWF)                                         | P04275             |
| Matrix extracellular phosphoglycoprotein (MEPE)        | Q9NQ76             | C-C motif chemokine 22 (CCL2)                                       | O00626             |

**Supplementary Table II.** Proteins assayed on the Luminex platform in FHS. Median value of coefficient of variation for FHS plasma samples is provided. (Number of FHS samples with measurable protein concentration varied by protein.)

| Plasma Protein |                                              | FHS samples for incident diabetes |         |           | FHS samples for incident metabolic syndrome |         |           |
|----------------|----------------------------------------------|-----------------------------------|---------|-----------|---------------------------------------------|---------|-----------|
| Abbreviation   | Protein name                                 | N                                 | Mean CV | Median CV | N                                           | Mean CV | Median CV |
| CD163          | Cluster of differentiation 163               | 4876                              | 2.98    | 2.40      | 3970                                        | 2.95    | 2.40      |
| GMP140         | Granule membrane protein 140                 | 4875                              | 5.53    | 4.17      | 3969                                        | 5.45    | 4.13      |
| IGFBP2         | Insulin-like growth factor binding protein 2 | 4866                              | 3.89    | 3.00      | 3963                                        | 3.80    | 2.90      |
| IGFBP1         | Insulin-like growth factor-binding protein 1 | 4649                              | 2.66    | 2.00      | 3849                                        | 2.57    | 1.90      |
| PAI1           | Plasminogen activator inhibitor 1            | 4877                              | 3.55    | 2.37      | 3971                                        | 3.59    | 2.41      |
| LDLR           | LDL receptor                                 | 4873                              | 3.06    | 2.20      | 3968                                        | 3.09    | 2.25      |



|        |         |         |         |       |       |       |      |      |      |                       |                       |                       |    |    |    |    |    |
|--------|---------|---------|---------|-------|-------|-------|------|------|------|-----------------------|-----------------------|-----------------------|----|----|----|----|----|
| CES1   | 32 (23) | 32 (30) | 32 (31) | 1.75  | 1.24  | 1.56  | 0.43 | 0.02 | NA   | 1.72 (1.47 - 1.91)    | 1.24 (1.23 - 1.24)    | 1.56 (1.56 - 1.56)    | NO | NA | NA | NA | NA |
| CHL1   | 32 (22) | 32 (14) | 32 (20) | 1.35  | 1.41  | 1.44  | 0.14 | 0.17 | 0.16 | 1.31 (1.26 - 1.35)    | 1.37 (1.27 - 1.52)    | 1.47 (1.31 - 1.53)    | NO | NA | NA | NA | NA |
| DFAL   | 32 (22) | 32 (24) | 32 (22) | 1.1   | 0.72  | 0.65  | 1.35 | 0.14 | 0.09 | 0.65 (0.61 - 0.81)    | 0.68 (0.64 - 0.76)    | 0.61 (0.59 - 0.72)    | NO | NA | NA | NA | NA |
| ENG    | 32 (18) | 32 (18) | 32 (21) | 0.16  | 0.12  | 0.13  | 0.21 | 0.16 | 0.2  | 0.12 (-0.04 - 0.33)   | 0.09 (-0.03 - 0.29)   | 0.09 (-0.01 - 0.24)   | NO | NA | NA | NA | NA |
| EPH4   | 32 (20) | 32 (18) | 32 (15) | 0.57  | 0.5   | 0.56  | 0.11 | 0.09 | 0.13 | 0.59 (0.48 - 0.63)    | 0.49 (0.45 - 0.52)    | 0.56 (0.48 - 0.62)    | NO | NA | NA | NA | NA |
| FAP    | 32 (25) | 32 (25) | 32 (25) | 0.93  | 0.96  | 1     | 0.2  | 0.18 | 0.19 | 0.89 (0.76 - 1.1)     | 0.98 (0.81 - 1.08)    | 0.92 (0.86 - 1.14)    | NO | NA | NA | NA | NA |
| FCGR2A | 32 (0)  | 32 (0)  | 32 (0)  | -0.05 | -0.24 | -0.23 | 0.46 | 0.47 | 0.55 | 0.07 (-0.18 - 0.23)   | -0.13 (-0.43 - 0.12)  | -0.09 (-0.5 - 0.22)   | NO | NA | NA | NA | NA |
| FTUB   | 32 (0)  | 32 (0)  | 32 (0)  | -0.99 | -1.12 | -1.18 | 0.48 | 0.42 | 0.52 | -1 (-1.22 - -0.72)    | -1.21 (-1.42 - -0.88) | -1.28 (-1.54 - -0.99) | NO | NA | NA | NA | NA |
| GNLY   | 32 (26) | 32 (28) | 32 (27) | 0.42  | 0.4   | 0.44  | 0.14 | 0.03 | 0.13 | 0.36 (0.35 - 0.44)    | 0.4 (0.38 - 0.41)     | 0.46 (0.32 - 0.48)    | NO | NA | NA | NA | NA |
| ICAM3  | 32 (20) | 32 (20) | 32 (19) | 0.98  | 1.01  | 0.97  | 0.19 | 0.2  | 0.22 | 0.95 (0.81 - 1.16)    | 0.99 (0.82 - 1.18)    | 0.91 (0.81 - 1.07)    | NO | NA | NA | NA | NA |
| IL7R   | 32 (28) | 32 (29) | 32 (29) | 0.52  | 0.83  | 0.69  | 0.05 | 0.25 | 0.2  | 0.53 (0.49 - 0.57)    | 0.97 (0.75 - 0.97)    | 0.62 (0.58 - 0.77)    | NO | NA | NA | NA | NA |
| ITGAM  | 32 (27) | 32 (26) | 32 (27) | 0.65  | 0.65  | 0.77  | 0.13 | 0.15 | 0.2  | 0.64 (0.58 - 0.7)     | 0.68 (0.52 - 0.78)    | 0.81 (0.59 - 0.84)    | NO | NA | NA | NA | NA |
| IT     | 32 (20) | 32 (18) | 32 (21) | 1.84  | 1.94  | 2.05  | 0.23 | 0.21 | 0.26 | 1.78 (1.68 - 1.98)    | 1.95 (1.76 - 2.11)    | 1.95 (1.89 - 2.24)    | NO | NA | NA | NA | NA |
| IIRB1  | 32 (0)  | 32 (0)  | 32 (0)  | -1.46 | -1.68 | -1.52 | 0.29 | 0.3  | 0.33 | -1.47 (-1.63 - -1.26) | -1.64 (-1.85 - -1.47) | -1.54 (-1.75 - -1.29) | NO | NA | NA | NA | NA |
| LTRP2  | 32 (32) | 32 (31) | 32 (32) | NA    | 1.8   | NA    | NA   | NA   | NA   | NA (NA - NA)          | 1.8 (1.8 - 1.8)       | NA (NA - NA)          | NO | NA | NA | NA | NA |
| MEGF9  | 32 (32) | 32 (30) | 32 (30) | NA    | 1.85  | 1.92  | NA   | 0.05 | 0.04 | NA (NA - NA)          | 1.85 (1.83 - 1.86)    | 1.92 (1.91 - 1.94)    | NO | NA | NA | NA | NA |
| MET    | 32 (27) | 32 (21) | 32 (24) | 1.41  | 1.35  | 1.42  | 0.14 | 0.18 | 0.17 | 1.41 (1.28 - 1.48)    | 1.29 (1.21 - 1.45)    | 1.4 (1.35 - 1.45)     | NO | NA | NA | NA | NA |
| MFAP5  | 32 (24) | 32 (20) | 32 (22) | 1.33  | 1.38  | 1.39  | 0.23 | 0.27 | 0.23 | 1.36 (1.24 - 1.39)    | 1.31 (1.18 - 1.55)    | 1.34 (1.18 - 1.58)    | NO | NA | NA | NA | NA |
| NRP1   | 32 (0)  | 32 (13) | 32 (8)  | -0.57 | -0.57 | -0.54 | 0.14 | 0.14 | 0.12 | -0.59 (-0.7 - -0.48)  | -0.61 (-0.68 - -0.47) | -0.53 (-0.63 - -0.46) | NO | NA | NA | NA | NA |
| OSMR   | 32 (1)  | 32 (0)  | 32 (0)  | -0.83 | -0.89 | -0.87 | 0.28 | 0.24 | 0.24 | -0.79 (-1.08 - -0.65) | -0.89 (-1.04 - -0.73) | -0.85 (-1.06 - -0.78) | NO | NA | NA | NA | NA |
| PAM    | 32 (0)  | 32 (0)  | 32 (0)  | -0.33 | -0.42 | -0.41 | 0.28 | 0.31 | 0.25 | -0.37 (-0.51 - -0.15) | -0.39 (-0.67 - -0.28) | -0.45 (-0.58 - -0.28) | NO | NA | NA | NA | NA |
| PLA2G7 | 32 (24) | 32 (23) | 32 (23) | 1.42  | 1.37  | 1.36  | 0.13 | 0.08 | 0.19 | 1.4 (1.35 - 1.48)     | 1.4 (1.28 - 1.45)     | 1.36 (1.19 - 1.47)    | NO | NA | NA | NA | NA |
| PLTP   | 32 (29) | 32 (31) | 32 (29) | 1.55  | 1.62  | 1.59  | 0.01 | NA   | 0.06 | 1.55 (1.54 - 1.56)    | 1.62 (1.62 - 1.62)    | 1.59 (1.56 - 1.62)    | NO | NA | NA | NA | NA |
| PLXNB2 | 32 (24) | 32 (22) | 32 (22) | 0.09  | 0.07  | 0.08  | 0.12 | 0.13 | 0.14 | 0.08 (0.04 - 0.12)    | 0.03 (0 - 0.09)       | 0.1 (-0.04 - 0.15)    | NO | NA | NA | NA | NA |
| PRCP   | 32 (20) | 32 (29) | 32 (23) | 0.36  | 0.19  | 0.17  | 0.23 | 0.08 | 0.11 | 0.3 (0.24 - 0.42)     | 0.2 (0.15 - 0.23)     | 0.13 (0.09 - 0.22)    | NO | NA | NA | NA | NA |
| PSP.D  | 32 (23) | 32 (20) | 32 (22) | 1.24  | 1.18  | 1.12  | 0.29 | 0.26 | 0.31 | 1.12 (1.08 - 1.46)    | 1.18 (0.92 - 1.35)    | 1.09 (0.89 - 1.19)    | NO | NA | NA | NA | NA |
| PTPRG  | 32 (18) | 32 (21) | 32 (14) | -0.13 | -0.12 | -0.1  | 0.15 | 0.14 | 0.15 | -0.14 (-0.23 - -0.04) | -0.18 (-0.25 - -0.02) | -0.11 (-0.24 - 0)     | NO | NA | NA | NA | NA |
| REG3A  | 32 (32) | 32 (32) | 32 (32) | NA    | NA    | NA    | NA   | NA   | NA   | NA (NA - NA)          | NA (NA - NA)          | NA (NA - NA)          | NO | NA | NA | NA | NA |
| SOD1   | 32 (32) | 32 (32) | 32 (32) | NA    | NA    | NA    | NA   | NA   | NA   | NA (NA - NA)          | NA (NA - NA)          | NA (NA - NA)          | NO | NA | NA | NA | NA |
| SPARC1 | 32 (25) | 32 (22) | 32 (24) | 0.91  | 0.86  | 0.98  | 0.15 | 0.15 | 0.19 | 0.89 (0.87 - 1)       | 0.87 (0.73 - 0.99)    | 0.96 (0.89 - 1.07)    | NO | NA | NA | NA | NA |
| SPOW1  | 32 (23) | 32 (24) | 32 (21) | 0.64  | 0.76  | 0.76  | 0.43 | 0.52 | 0.45 | 0.4 (0.34 - 1.15)     | 0.51 (0.33 - 1.24)    | 0.55 (0.35 - 1.19)    | NO | NA | NA | NA | NA |
| TGFBF3 | 32 (31) | 32 (27) | 32 (28) | 2.03  | 1.99  | 2.02  | NA   | 0.1  | 0.19 | 2.03 (2.03 - 2.03)    | 2.05 (1.89 - 2.06)    | 1.96 (1.89 - 2.09)    | NO | NA | NA | NA | NA |
| TIE1   | 32 (0)  | 32 (0)  | 32 (0)  | -0.03 | -0.15 | -0.13 | 0.23 | 0.25 | 0.25 | 0 (-0.19 - 0.06)      | -0.09 (-0.34 - 0)     | -0.16 (-0.35 - 0)     | NO | NA | NA | NA | NA |
| TNC    | 32 (1)  | 32 (0)  | 32 (0)  | -0.09 | -0.03 | -0.1  | 0.43 | 0.5  | 0.48 | -0.15 (-0.33 - 0.06)  | -0.08 (-0.36 - 0.25)  | -0.11 (-0.38 - 0.19)  | NO | NA | NA | NA | NA |
| TVXB   | 32 (24) | 32 (21) | 32 (23) | -0.09 | -0.07 | -0.05 | 0.11 | 0.1  | 0.2  | -0.09 (-0.18 - -0.01) | -0.09 (-0.15 - -0.01) | -0.08 (-0.24 - 0.08)  | NO | NA | NA | NA | NA |
| UMOD   | 32 (29) | 32 (30) | 32 (30) | 0.27  | 0.23  | 0.37  | 0.08 | 0.02 | 0.13 | 0.23 (0.22 - 0.29)    | 0.23 (0.22 - 0.23)    | 0.37 (0.32 - 0.41)    | NO | NA | NA | NA | NA |
| VASN   | 32 (16) | 32 (19) | 32 (21) | -0.23 | -0.14 | -0.18 | 0.13 | 0.11 | 0.17 | -0.25 (-0.32 - -0.16) | -0.1 (-0.23 - -0.09)  | -0.24 (-0.32 - -0.03) | NO | NA | NA | NA | NA |

**Supplementary Table IV.** Genes encoding 19 proteins differentially expressed after bariatric surgery, and ratio of expression in the top and next highest expressing tissue, expressed as fold change (log).

| <b>Gene</b> | <b>Comparison between top expressed tissue and next expressed</b> | <b>log-FC</b> |
|-------------|-------------------------------------------------------------------|---------------|
| C1QTNF1     | adipose_tissue-heart                                              | 0.88          |
| ITGB2       | bone_marrow-lymph_node                                            | 1.11          |
| CNDP1       | cerebral_cortex-liver                                             | 0.19          |
| SPP1        | gall_bladder-kidney                                               | 0.50          |
| COMP        | gall_bladder-smooth_muscle_tissue                                 | 0.64          |
| COL1A1      | gall_bladder-smooth_muscle_tissue                                 | 0.63          |
| FCN2        | liver-adrenal_gland                                               | 3.97          |
| LDLR        | liver-adrenal_gland                                               | 0.99          |
| SERPINE1    | liver-gall_bladder                                                | 0.68          |
| IGFBP1      | liver-kidney                                                      | 10.57         |
| CTSD        | liver-lung                                                        | 0.16          |
| RARRES2     | liver-pancreas                                                    | 0.32          |
| SAA4        | liver-saliva_secreting_gland                                      | 8.31          |
| PON3        | liver-saliva_secreting_gland                                      | 4.03          |
| IGFBP2      | pancreas-liver                                                    | 0.67          |
| PLAT        | urinary_bladder-gall_bladder                                      | 0.91          |
| SELE        | urinary_bladder-smooth_muscle_tissue                              | 0.50          |
| SELP        | urinary_bladder-smooth_muscle_tissue                              | 0.24          |
| CD163       | vermiform_appendix-smooth_muscle_tissue                           | 0.24          |

**Supplementary Table V.** STRING-expanded set of 26 proteins for pathway analysis. This list contains 16/19 proteins identified from the bariatric surgical cohort, “augmented” by 10 additional proteins identified by STRING. Details in text.

COL1A1  
LDLR  
IGFBP1  
ITGB2  
CTSD  
IGFBP2  
SELP  
SPP1  
SELE  
SERPINE1  
CD163  
PLAT  
RARRES2  
COMP  
FCN2  
PON3  
ALB  
IL6  
EGF  
VEGFA  
PLG  
INS  
VWF  
IGF1  
TGFB1  
ITGA2B

**Supplementary Table VI.** Characteristics of FHS participants stratified by new-onset diabetes or metabolic syndrome. Values are expressed as mean with standard deviation or frequency and percentage. Comparisons for continuous variables were performed age- and sex-adjusted via a linear regression. Comparisons for categorical variables were performed age- and sex-adjusted via a logistic regression. The \* and \*\* indicate P<0.05 for comparison between individuals with or without diabetes (\*) or metabolic syndrome (\*\*).

| Characteristics                                                         | Diabetes cohort (N=4877)               |                             | Metabolic syndrome cohort (N=3971)               |                                     |
|-------------------------------------------------------------------------|----------------------------------------|-----------------------------|--------------------------------------------------|-------------------------------------|
|                                                                         | Participants without diabetes (N=4685) | New-onset diabetes (N=192)* | Participants without metabolic syndrome (N=3543) | new-onset metabolic syndrome(428)** |
| Age, year                                                               | 48.1±12.8                              | 56.3±11.6*                  | 46.6±12.7                                        | 52.1±11.6**                         |
| Women (n, %)                                                            | 2529 (54%)                             | 81 (42%)*                   | 1983 (56%)                                       | 222 (52%)                           |
| Framingham cohort (% in the Offspring cohort, versus Third Generation ) | 1971 (42%)                             | 125 (65%)                   | 1335 (38%)                                       | 243 (57%)                           |
| Systolic blood pressure, mmHg                                           | 119.7±15.9                             | 132.7±17.6*                 | 116.7±14.6                                       | 124.7±15.3**                        |
| Diastolic blood pressure, mmHg                                          | 74.8±9.5                               | 78.8±9.9*                   | 73.4±9.0                                         | 77.0±9.0**                          |
| Current cigarette smoker (n, %)                                         | 594 (13%)                              | 22 (11%)                    | 423(12%)                                         | 77 (18%)                            |
| Body mass index, kg/m <sup>2</sup>                                      | 27.0±5.0                               | 32.4±6.3*                   | 25.7±4.1                                         | 29.8±4.8**                          |
| Waist circumference, cm                                                 | 82.9±12.2                              | 96.3±12.9*                  | 79.4±10.6                                        | 90.2±10.8**                         |
| Sedentary status (n, %)                                                 | 411 (9%)                               | 14 (7%)                     | 289 (8%)                                         | 53 (12%)                            |
| High school degree or less (n, %)                                       | 1022 (22%)                             | 67 (35%)*                   | 663 (19%)                                        | 133 (31%)                           |
| Some college education (n, %)                                           | 1402 (30%)                             | 62 (32%)                    | 1040(29%)                                        | 139 (32%)                           |
| College graduate or more (n, %)                                         | 2261 (48%)                             | 63 (33%)                    | 1840(52%)                                        | 156 (36%)                           |
| Drinks per week, cups                                                   | 5.4±7.7                                | 4.9±7.3*                    | 5.4±7.3                                          | 5.2±7.0                             |
| Insulin perSTD ,pmol/l                                                  | 51.3±39.4                              | 96.7±70.5*                  | 42.2±29.8.                                       | 66.8±41.4**                         |
| Fasting glucose mg/dl                                                   | 94.5±8.7                               | 110.2±9.6*                  | 92.7±8.0                                         | 97.1±8.1**                          |

|                                                              |                      |                      |                      |                       |
|--------------------------------------------------------------|----------------------|----------------------|----------------------|-----------------------|
| High density lipoprotein, mg/dl                              | 54.8±16.2            | 46.8±15.2*           | 57.9±15.8            | 50.7±15.4**           |
| Triglycerides, mg/dl                                         | 118.3±76.2           | 173.8±127.7*         | 98.1±53.9            | 140.6±73.0**          |
| Insulin-like growth factor binding protein 2 (IGFBP2), pg/mL | 11013991.5±6540219.4 | 8199166.7±5776225.2* | 11793590.2±6665711.4 | 9288644.9±5762659.5** |
| Insulin-like growth factor binding protein 1, pg/mL          | 11445.2±14155.2      | 7535.9±8598.0*       | 12866.0±15141.6      | 8849.9±11498.5**      |
| P-selectin (GMP-140), pg/ml                                  | 16147.8±4997.9       | 17194.2±5215.9       | 15760±4889.1         | 16523.9±4570.1**      |
| Plasminogen activator inhibitor-1 (PAI-1), pg/ml             | 18220.8±10129.6      | 25164.4±12683.0*     | 16467.5.4±6665711.4  | 20776.4±10503.4**     |
| Cluster of differentiation 163 (CD163), pg/ml                | 113173.9±71974.8     | 122132.3±56538.7     | 110007.8±15141.6     | 113899.3±66050.5      |
| Low density lipoprotein receptor (LDL-R), pg/ml              | 235232.4±302173.4    | 234412.0±257652.8    | 235611.1±315201      | 208365.2±206933.5     |
